# Supplementary material for: Distyrylbenzene-aldehydes: identification of proteins in water
Source: Royal Society of Chemistry journal article supplement (doi:10.1039/c5an00155b), 2015-01-01
Supplement: c5an00155b1.pdf [file c5an00155b1.pdf]

# Distyrylbenzene-aldehydes: identification of proteins in water

Jan Kumpf, Jan Freudenberg and Uwe H. F. Bunz<sup>a</sup>

Organisch-Chemisches Institut, Ruprecht-Karls-Universität Heidelberg, Im Neuenheimer Feld 270, 69120 Heidelberg, Germany. E-Mail: uwe.bunz@oci.uni-heidelberg.de

## Supporting Information

### Contents:

|     |                                            |    |
|-----|--------------------------------------------|----|
| 1   | Synthesis.....                             | 2  |
| 2   | Protein Sensing.....                       | 8  |
| 2.1 | Absorption and Emission Spectra.....       | 8  |
| 2.2 | Detection Limit.....                       | 11 |
| 2.3 | Comparison of Proteins and Amino Acid..... | 12 |
| 2.4 | Linear Discriminant Analysis.....          | 12 |
| 3   | NMR spectra.....                           | 16 |

# 1 Synthesis

## General Experimental Methods:

All reagents, solvents and Proteins have been purchased from Sigma Aldrich and were used without further purification unless otherwise specified. Preparation of air- and moisture-sensitive materials was carried out in oven dried flasks under a nitrogen atmosphere using Schlenk techniques. Column chromatography was performed using Standard Grade silica gel 60 Å. Compounds **2**, **4**, and **9** were prepared as reported.<sup>1</sup> <sup>1</sup>H NMR spectra were recorded at 298 K on a 300, 400, 500 or 600 MHz spectrometer, and <sup>13</sup>C NMR spectra were recorded on a 75, 100, 125 or 150 MHz spectrometer. Chemical shifts ( $\delta$ ) are reported in parts per million (ppm) relative to traces of CHCl<sub>3</sub>. MS spectra were recorded using fast atom bombardment, electrospray ionization or electron impact detected by magnetic sector and FT-ICR techniques, respectively. Infrared (IR) spectra are reported in wavenumbers (cm<sup>-1</sup>) and were recorded neat. Absorption spectra were recorded in a rectangular quartz cuvette (light path = 10 mm) on a Jasco UV-VIS V-660 spectrophotometer. Fluorescence spectra were recorded in a conventional quartz cuvette (10 x 10x 40 mm) on a Jasco FP-6500 fluorospectrometer. Photographs were taken with a Canon EOS 7D (objective: EF-S60mm f/2.8 Macro USM) with shutter speed 0.10 s.

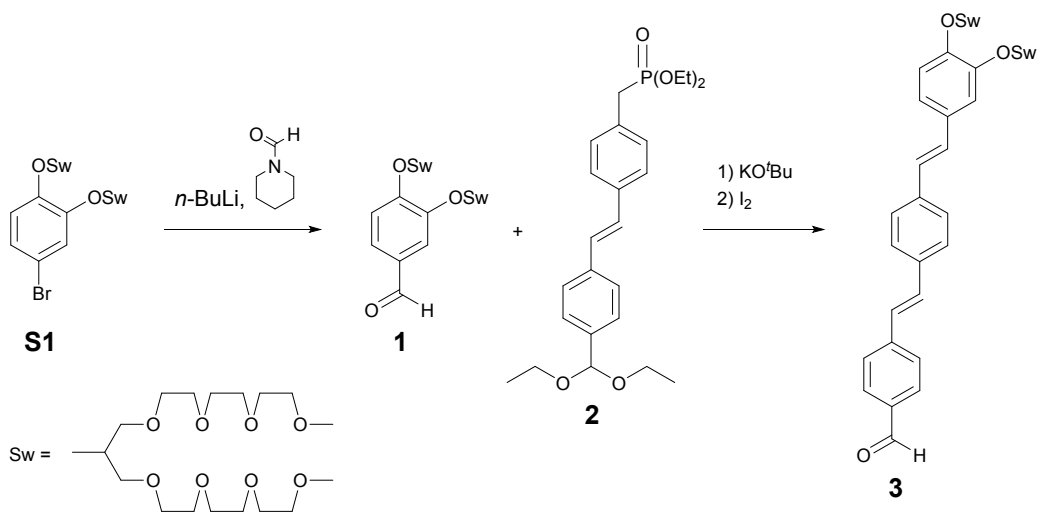

**Scheme S1** Synthesis of DSB **3**.

**13,13'-[(4-Bromobenzene-1,2-diyl)bis(oxy)]bis(2,5,8,11,15,18,21,24-octaoxapentacosane) (S1):**

In a 100 mL Schlenk flask  $K_2CO_3$  (6.53 g, 47.3 mmol, 7.00 eq) was added to a solution of swallowtail tosylate (8.00 g, 14.9 mmol, 2.20 eq) in 2-butanone (30 mL). The suspension was degassed, 4-bromobenzene-1,2-diol (1.28 g, 6.75 mmol, 1.00 eq) was added and the mixture was refluxed for 4 d (80 °C). The salts were filtered through Celite with dichloromethane as eluent, the solvents were removed by rotary evaporation and the crude product was purified by column chromatography on silica gel (petroleum ether/dichloromethane/ethyl acetate/methanol = 5:3:1:0.6,  $R_f$  = 0.09) to yield the desired compound as a pale yellow oil (5.58 g, 6.05 mmol, 90 %).  $^1H$  NMR (300 MHz,  $CDCl_3$ ):  $\delta$  7.19 (d,  $J$  = 2.2 Hz, 1H), 6.99 (dd,  $J$  = 8.6 Hz, 2.2 Hz, 1H), 6.92 (d,  $J$  = 8.6 Hz, 1H), 4.46-4.36 (m, 2H), 3.70-3.59 (m, 48H), 3.54-3.51 (m, 8H), 3.36 (s, 12H).  $^{13}C\{^1H\}$ -NMR (150 MHz,  $CDCl_3$ ):  $\delta$  150.3, 148.5, 125.0, 121.5, 120.2, 78.99, 78.97, 72.0, 71.1, 71.0, 70.7-70.6, 59.1. IR ( $cm^{-1}$ ): 2868, 1489, 1351, 1255, 1200, 1098, 1040, 943, 849. HRMS (ESI):  $m/z$   $[M+Na]^+$  calcd for  $C_{40}H_{73}BrO_{18}Na$  943.3873, found 943.3884;  $m/z$   $[M+K]^+$  calcd for  $C_{40}H_{73}BrO_{18}K$  959.3612, found 959.3618. Elemental analysis: calcd (%) for  $C_{40}H_{73}BrO_{18}$ : C 52.11, H 7.98, Br 8.67, found: C 51.94, H 7.76, Br 8.53.

**3,4-Bis(2,5,8,11,15,18,21,24-octaoxapentacosan-13-yloxy)benzaldehyde (1):**

To a solution of **S1** (1.00 g, 1.08 mmol, 1.00 eq) in dry THF (40 mL) *n*-BuLi (2.24 mL of a 1.6 M solution in hexanes, 3.58 mmol, 3.30 eq) was added dropwise at -78 °C and the mixture was stirred for 1.5 h. Then *N*-formylpiperidine (337  $\mu$ L, 3.04 mmol, 2.80 eq) was added slowly and the reaction mixture was stirred at -78 °C for 4 h before it was quenched with a saturated aqueous  $NH_4Cl$ -solution (20 mL) at 0 °C. The layers were separated and the aqueous layer was extracted with dichloromethane (5 x 20 mL). The combined organic layers were dried over  $MgSO_4$  and the solvents were evaporated. Purification by column chromatography (silica gel, petroleum ether/dichloromethane/ethyl acetate/methanol = 5:3:1:0.7,  $R_f$  = 0.08) afforded the desired compound as a pale yellow oil (720 mg, 827  $\mu$ mol, 76 %).  $^1H$  NMR (300 MHz,  $CDCl_3$ ):  $\delta$  9.82 (s, 1H), 7.58 (d,  $J$  = 1.9 Hz, 1H), 7.45 (dd,  $J$  = 8.4 Hz, 1.9 Hz, 1H), 7.17 (d,  $J$  = 8.4 Hz, 1H), 4.63 (quin,  $J$  = 5.1 Hz, 1H), 4.51 (quin,  $J$  = 5.1 Hz, 1H), 3.74-3.71 (m, 8H), 3.62-3.60 (m, 40H), 3.57-3.51 (m, 8H), 3.36 (s, 12H).  $^{13}C\{^1H\}$ -NMR (100 MHz,  $CDCl_3$ ):  $\delta$  190.9, 155.0, 149.3, 130.7, 126.2, 117.7, 116.2, 78.8, 78.4, 72.0, 71.11, 71.09, 70.7-70.6, 59.1. IR ( $cm^{-1}$ ): 2868, 1687, 1595, 1502, 1454,

1436, 1351, 1270, 1199, 1099, 1040, 997, 942, 849. HRMS (ESI):  $m/z$   $[M+Na]^+$  calcd for  $C_{41}H_{74}O_{19}Na$  893.4717, found 893.4717;  $m/z$   $[M+K]^+$  calcd for  $C_{41}H_{74}O_{19}K$  909.4456, found 909.4456.

**4-[(E)-2-(4-[(E)-2-[3,4-Bis(2,5,8,11,15,18,21,24-octaoxapentacosan-13-yloxy)phenyl]ethenyl}phenyl)ethenyl]benzaldehyde (3):**

Compound **2** (164 mg, 379  $\mu$ mol, 1.10 eq) was dissolved in dry THF (4 mL). The mixture was cooled to 0 °C and KO<sup>t</sup>Bu (50.2 mg, 448  $\mu$ mol, 1.30 eq) was added carefully. The mixture was stirred at 0 °C for 10 min before aldehyde **1** was added dropwise. The reaction mixture was allowed to warm to rt and stirred overnight. The reaction was quenched by adding water (10 mL) and a saturated aqueous NH<sub>4</sub>Cl-solution (10 mL). The layers were separated and the aqueous layer was extracted with DCM (5 x 20 mL). The combined organic extracts were washed with brine and dried over MgSO<sub>4</sub> and the solvents were removed by rotary evaporation.

Deprotection:

To a solution of the crude acetal (253 mg, 220  $\mu$ mol, 1.00 eq) in toluene (4 mL) a catalytic amount of iodine was added. The mixture was refluxed for 4 h and then quenched with a saturated NaSO<sub>3</sub>-solution. The layers were separated and the aqueous layer was extracted with dichloromethane (4 x 10 mL). The combined organic extracts were dried over MgSO<sub>4</sub> and the solvents were evaporated. Column chromatography (silica gel, petroleum ether/dichloromethane/ethyl acetate/methanol = 5:3:1:0.6,  $R_f$  = 0.09) afforded the desired compound as a bright yellow oil (214.0 mg, 199  $\mu$ mol, 64 % over both steps). <sup>1</sup>H NMR (300 MHz, CDCl<sub>3</sub>):  $\delta$  10.00 (s, 1H), 7.87 (d,  $J$  = 8.3 Hz, 2H), 7.66 (d,  $J$  = 8.3 Hz, 2H), 7.54 (d,  $J$  = 8.4 Hz, 2H), 7.50 (d,  $J$  = 8.4 Hz, 2H), 7.26 (d,  $J$  = 16.3 Hz, 1H), 7.15 (d,  $J$  = 16.3 Hz, 1H), 7.08-7.02 (m, 3H), 6.96 (d,  $J$  = 16.3 Hz, 1H), 4.57-4.46 (m, 2H), 3.76-3.59 (m, 48H), 3.55-3.50 (m, 8H), 3.37 (s, 6H), 3.35 (s, 6H). <sup>13</sup>C{<sup>1</sup>H}-NMR (75 MHz, CDCl<sub>3</sub>):  $\delta$  191.7, 149.3, 143.6, 137.9, 135.7, 135.4, 131.9, 131.8, 130.4, 128.9, 127.4, 127.1, 127.0, 126.9, 126.8, 121.3, 118.4, 116.5, 78.7, 78.6, 72.05, 72.03, 71.1, 70.7-70.6, 59.1. IR (cm<sup>-1</sup>): 2870, 1503, 1454, 1349, 1268, 1200, 1097, 1051, 962, 847, 539. HRMS (ESI):  $m/z$   $[M+Na]^+$  calcd for  $C_{57}H_{86}O_{19}Na$  1097.5656, found 1097.5609;  $m/z$   $[M+K]^+$  calcd for  $C_{57}H_{86}O_{19}K$  1113.5395, found 1113.5419. Elemental analysis: calcd (%) for  $C_{57}H_{86}O_{19}$ : C 63.67, H 8.06, found: C 63.60, H 8.20.

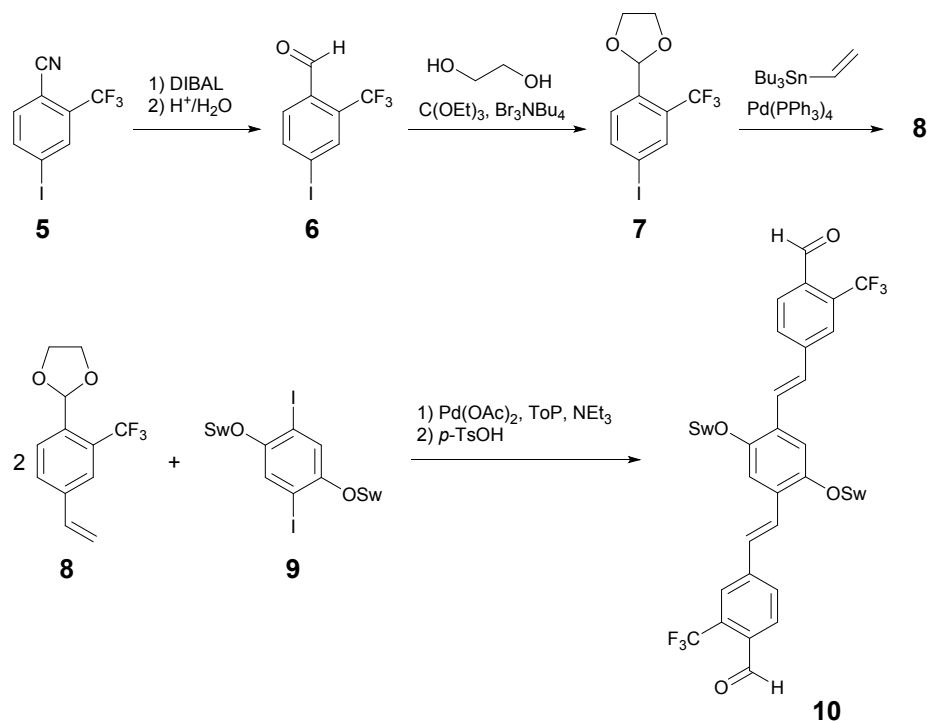

**Scheme S2** Synthesis of DSB **10**.

**4-Iodo-2-(trifluoromethyl)benzaldehyde (6):**

Under a nitrogen atmosphere a solution of 4-iodo-2-(trifluoromethyl)benzonitrile (1.00 g, 3.37 mmol, 1.00 eq) in dry dichloromethane (10 mL) was treated with DIBAL (4.04 mL of a 1 M solution in DCM, 4.04 mmol, 1.20 eq) at 0 °C. The ice bath was removed and the reaction mixture was stirred at rt for 3 h. The mixture was carefully poured into a mixture of crushed ice (25 g) and 6 N HCl (65 mL) and stirred for 1 h. The layers were separated and the aqueous layer was extracted with dichloromethane (2 x 50 mL). The combined organic extracts were washed with a 10 % aqueous solution of NaHCO<sub>3</sub> and brine and dried over MgSO<sub>4</sub>. The solvents were removed under reduced pressure to yield the desired compound as a slightly yellow solid (1.00 g, 3.33 mmol, 99 %, mp = 74-76 °C). <sup>1</sup>H NMR (500 MHz, CDCl<sub>3</sub>): δ 10.33 (m, 1H), 8.13 (s, 1H), 8.08 (d, *J* = 8.1 Hz, 1H), 7.81 (d, *J* = 8.1 Hz, 1H). <sup>13</sup>C{<sup>1</sup>H}-NMR (125 MHz, CDCl<sub>3</sub>): δ 188.2 (q, *J* = 2.9 Hz), 141.9, 135.3 (q, *J* = 5.8 Hz), 133.0 (m), 132.1 (q, *J* = 32.9 Hz), 130.3, 122.7 (q, *J* = 275.0 Hz), 101.3. <sup>19</sup>F{<sup>1</sup>H}-NMR (470 MHz, CDCl<sub>3</sub>): δ -55.81. IR (cm<sup>-1</sup>): 2359, 1686, 1580, 1559, 1418, 1300, 1271, 1202, 1155, 1115, 1063, 1049, 898, 846, 831, 781, 686, 656, 515, 509, 446. HRMS (EI): *m/z* [M]<sup>+</sup>calcd for C<sub>8</sub>H<sub>4</sub>F<sub>3</sub>IO 299.9259, found 299.9272.

**2-[4-Iodo-2-(trifluoromethyl)phenyl]-1,3-dioxolane (7):**

To a suspension of **6** (500 mg, 1.67 mmol, 1.00 eq) and triethyl orthoformate (195  $\mu$ L, 1.83 mmol, 1.10 eq) in ethylene glycol (1 mL) tetra-*n*-butylammonium tribromide (9.00 mg, 16.7  $\mu$ mol, 0.01 eq) was added. The reaction mixture was stirred at rt overnight. The reaction mixture was purified directly by column chromatography (silica gel, petroleum ether/ethyl acetate = 20:1,  $R_f$  = 0.18) to yield the desired compound as a colorless oil (398 mg, 1.16 mmol, 69 %).  $^1\text{H}$  NMR (300 MHz,  $\text{CDCl}_3$ ):  $\delta$  7.99 (m, 1H), 7.94-7.91 (m, 1H), 7.54 (d,  $J$  = 8.3 Hz, 1H), 6.07 (m, 1H), 4.18-4.03 (m, 4H).  $^{13}\text{C}\{^1\text{H}\}$ -NMR (125 MHz,  $\text{CDCl}_3$ ):  $\delta$  141.3 (m), 136.2 (m), 134.8 (q,  $J$  = 5.8 Hz), 130.4 (q,  $J$  = 31.8 Hz), 129.8, 123.0 (q,  $J$  = 275.4 Hz), 99.4 (q,  $J$  = 2.3 Hz) 94.7, 65.8.  $^{19}\text{F}\{^1\text{H}\}$ -NMR (280 MHz,  $\text{CDCl}_3$ ):  $\delta$  -57.97. IR ( $\text{cm}^{-1}$ ): 2889, 2359, 1416, 1300, 1271, 1211, 1167, 1122, 1088, 1044, 976, 942, 891, 851, 823, 722, 684, 651, 536, 472. HRMS (EI):  $m/z$   $[\text{M}]^+$  calcd for  $\text{C}_{10}\text{H}_8\text{F}_3\text{IO}_2$  343.9521, found 343.9524.

**2-[4-Ethenyl-2-(trifluoromethyl)phenyl]-1,3-dioxolane (8):**

A solution of **7** (690 mg, 2.01 mmol, 1.00 eq) in DMF (20 mL) was degassed. After addition of vinyl tributyltin (642  $\mu$ L, 2.21 mmol, 1.10 eq) and  $\text{Pd}(\text{PPh}_3)_4$  (116 mg, 100  $\mu$ mol, 5 mol%) the reaction mixture was stirred at 100  $^\circ\text{C}$  overnight. The reaction mixture was allowed to cool to rt, filtered through Celite with dichloromethane as eluent and the solvents were removed under reduced pressure. The residue was purified by column chromatography (silica gel, petroleum ether/ethyl acetate = 20:1) two times to yield the desired product as a colorless oil (407 mg, 1.67 mmol, 83 %,  $R_f$  = 0.15).  $^1\text{H}$  NMR (300 MHz,  $\text{CDCl}_3$ ):  $\delta$  7.78 (d,  $J$  = 8.2 Hz, 1H), 7.68 (m, 1H), 7.62-7.59 (m, 1H), 6.74 (dd,  $J$  = 17.6 Hz, 10.9 Hz, 1H), 6.11 (m, 1H), 5.84 (d,  $J$  = 17.6 Hz, 1H), 5.38 (d,  $J$  = 10.9 Hz, 1H), 4.23-4.02 (m, 4H).  $^{13}\text{C}\{^1\text{H}\}$ -NMR (125 MHz,  $\text{CDCl}_3$ ):  $\delta$  138.9, 135.5 (m), 135.4, 129.5 (m), 129.1 (q,  $J$  = 31.4 Hz), 128.4, 124.1 (q,  $J$  = 273.6 Hz), 123.7 (q,  $J$  = 5.8 Hz), 116.5, 99.7 (q,  $J$  = 2.6 Hz), 65.7.  $^{19}\text{F}\{^1\text{H}\}$ -NMR (280 MHz,  $\text{CDCl}_3$ ):  $\delta$  -57.87. IR ( $\text{cm}^{-1}$ ): 2890, 1435, 1408, 1316, 1279, 1196, 1162, 1119, 1088, 1049, 987, 958, 943, 917, 902, 846, 821, 739, 723, 667. HRMS (EI):  $m/z$   $[\text{M}]^+$  calcd for  $\text{C}_{12}\text{H}_{11}\text{F}_3\text{O}_2$  244.0711, found 244.0703.

**4,4'-{[2,5-bis(2,5,8,11,15,18,21,24-octaoxapentacosan-13-yloxy)benzene-1,4-diyl]di(*E*)ethene-2,1-diyl}bis[2-(trifluoromethyl)benzaldehyde] (10):**

The reaction was performed in a heat-gun dried Schlenk tube under a nitrogen atmosphere. **9** (200 mg, 183  $\mu\text{mol}$ , 1.00 eq) and **8** (98.2 mg, 402  $\mu\text{mol}$ , 2.20 eq) were dissolved in dry DMF (5 mL). Pd(OAc)<sub>2</sub> (2 mg, 7.3  $\mu\text{mol}$ , 0.04 eq), tris(*o*-tolyl)phosphine (11.1 mg, 36.5  $\mu\text{mol}$ , 0.20 eq) and triethylamine (0.5 mL) were added. The mixture was stirred at 120 °C for 72 h. After the reaction mixture was cooled to ambient temperature it was poured into 50 mL of water to give a yellow suspension which was extracted with dichloromethane (4 x 50 mL). The combined organic layers were dried over MgSO<sub>4</sub> and the solvents were removed under reduced pressure. The residue was purified by column chromatography (silica gel, petroleum ether/dichloromethane/ethyl acetate/methanol = 5:3:1:0.5, *R<sub>f</sub>* = 0.12) to yield the desired acetal as a yellow oil (138 mg, 104  $\mu\text{mol}$ , 57 %).

**Deprotection:**

The acetal (114 mg, 85.9  $\mu\text{mol}$ , 1.00 eq) was dissolved in acetone/water = 3:1 (3 mL acetone + 1 mL water) and a catalytic amount of *p*-toluenesulfonic acid was added. The solution was stirred at 40 °C overnight. The reaction was quenched by addition of a saturated aqueous solution of NaHCO<sub>3</sub> (10 mL) and dichloromethane (10 mL). The layers were separated and the aqueous layer was extracted with dichloromethane (4 x 10 mL). The combined organic extracts were dried over MgSO<sub>4</sub> and the solvents were evaporated. Column chromatography (silica gel, ethyl acetate/methanol = 10:0.6, *R<sub>f</sub>* = 0.28) afforded the desired compound as an orange colored liquid (88 mg, 186  $\mu\text{mol}$ , 92 %). <sup>1</sup>H NMR (400 MHz, CDCl<sub>3</sub>):  $\delta$  10.36 (m, 2H), 8.13 (d, *J* = 8.1 Hz, 2H), 7.88-7.84 (m, 4H), 7.70 (d, *J* = 16.5 Hz, 2H), 7.40 (s, 2H), 7.21 (d, *J* = 16.5 Hz, 2H), 4.55 (quin, *J* = 5.0 Hz, 2H), 3.83-3.76 (m, 8H), 3.70-3.57 (m, 40H), 3.50-3.48 (m, 8H), 3.33 (s, 12H). <sup>13</sup>C{<sup>1</sup>H}-NMR (100 MHz, CDCl<sub>3</sub>):  $\delta$  188.4 (m), 151.7, 143.7, 132.1 (m), 131.7 (q, *J* = 32.2 Hz), 129.9, 129.6, 128.8, 128.4, 127.2, 124.3 (q, *J* = 5.7 Hz), 123.9 (q, *J* = 275.2 Hz), 114.8, 80.0, 72.0, 71.2, 70.9, 70.7-70.6 (m), 59.1. <sup>19</sup>F{<sup>1</sup>H}-NMR (280 MHz, CDCl<sub>3</sub>):  $\delta$  -55.81. IR (cm<sup>-1</sup>): 2871, 1692, 1596, 1486, 1456, 1420, 1349, 1320, 1273, 1252, 1199, 1165, 1103, 1050, 966, 926, 850, 806, 667, 535. HRMS (ESI): *m/z* [M+H]<sup>+</sup> calcd for C<sub>60</sub>H<sub>85</sub>F<sub>6</sub>O<sub>20</sub> 1239.5533, found 1239.5554; *m/z* [M+Na]<sup>+</sup> calcd for C<sub>60</sub>H<sub>84</sub>F<sub>6</sub>O<sub>20</sub>Na 1261.5352, found 1261.5370. Elemental analysis: calcd (%) for C<sub>60</sub>H<sub>84</sub>F<sub>6</sub>O<sub>20</sub>: C 58.15, H 6.83, found: C 57.79, H 6.81.

## 2 Protein Sensing

### 2.1 Absorption and Emission Spectra

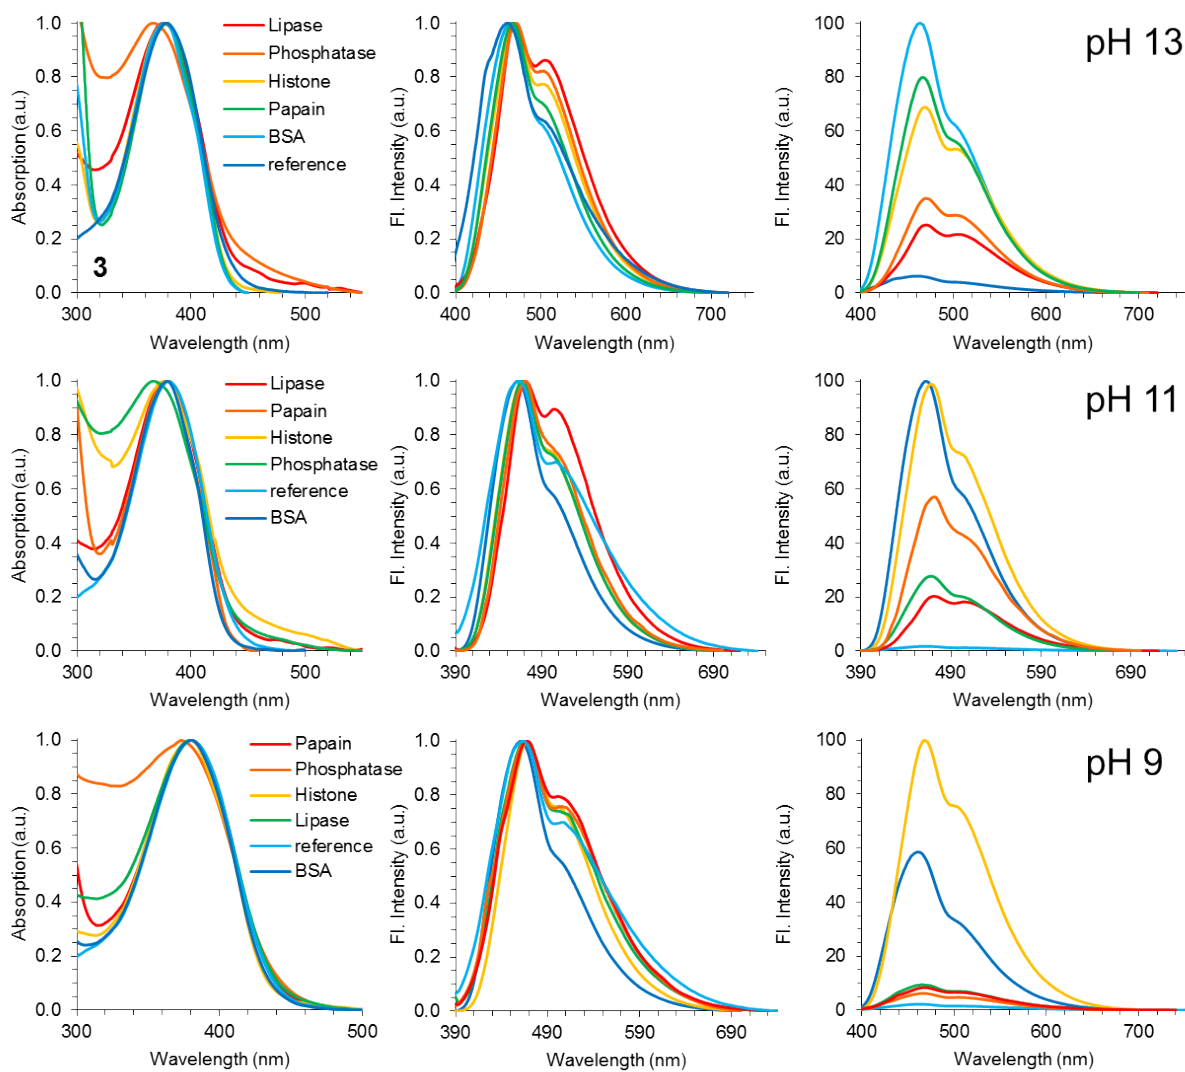

**Fig S1** Absorption spectra (left), normalized emission spectra (middle), and non-normalized emission spectra (right) of buffered aqueous solutions (top: pH 13, middle: pH 11, bottom: pH 9) of **3** upon addition of different proteins.



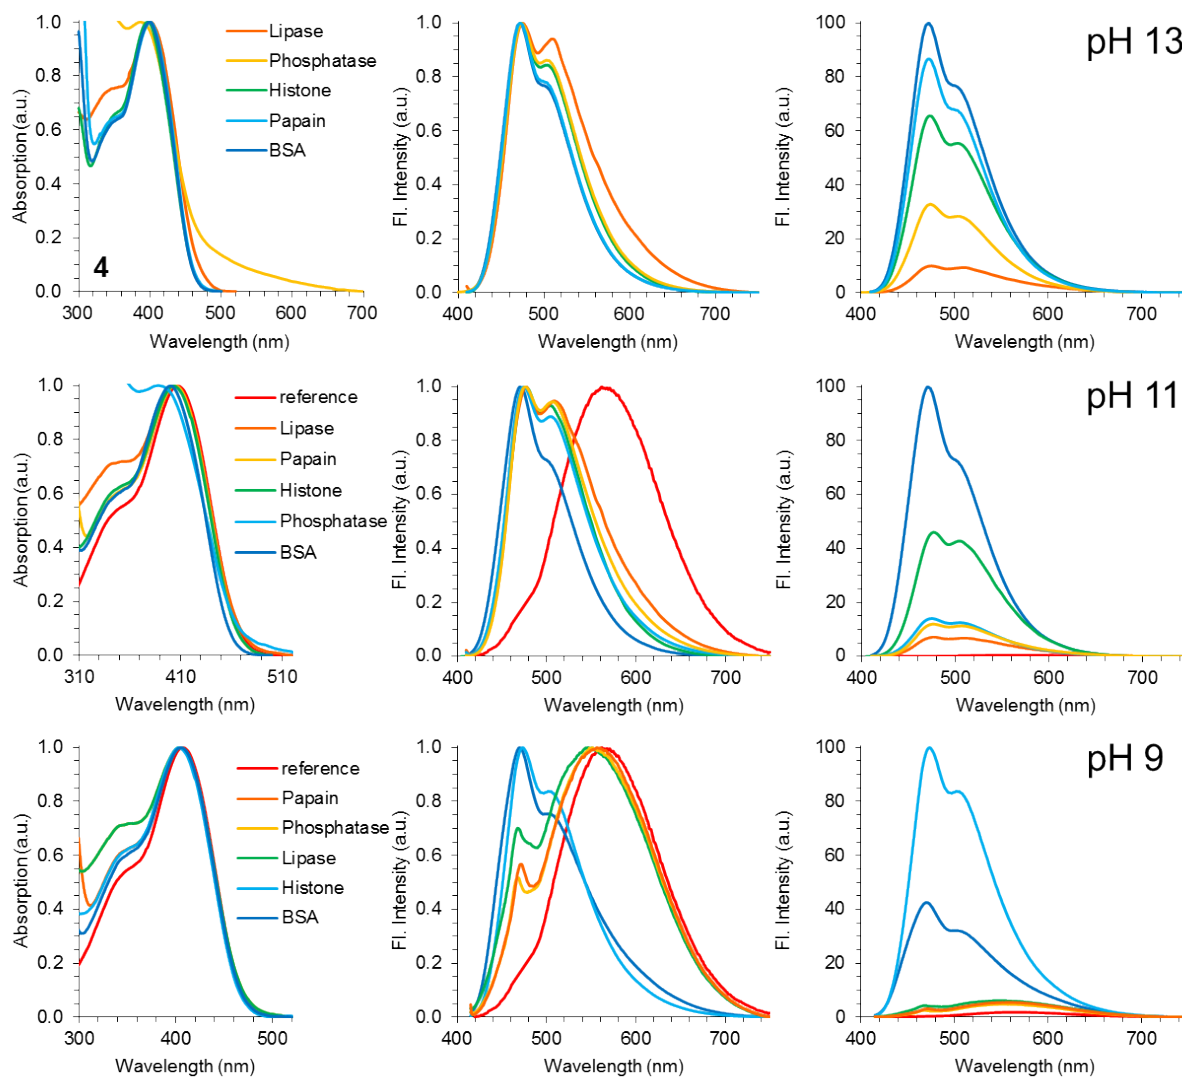

**Fig S2** Absorption spectra (left), normalized emission spectra (middle), and non-normalized emission spectra (right) of buffered aqueous solutions (top: pH 13, middle: pH 11, bottom: pH 9) of **4** upon addition of different proteins.

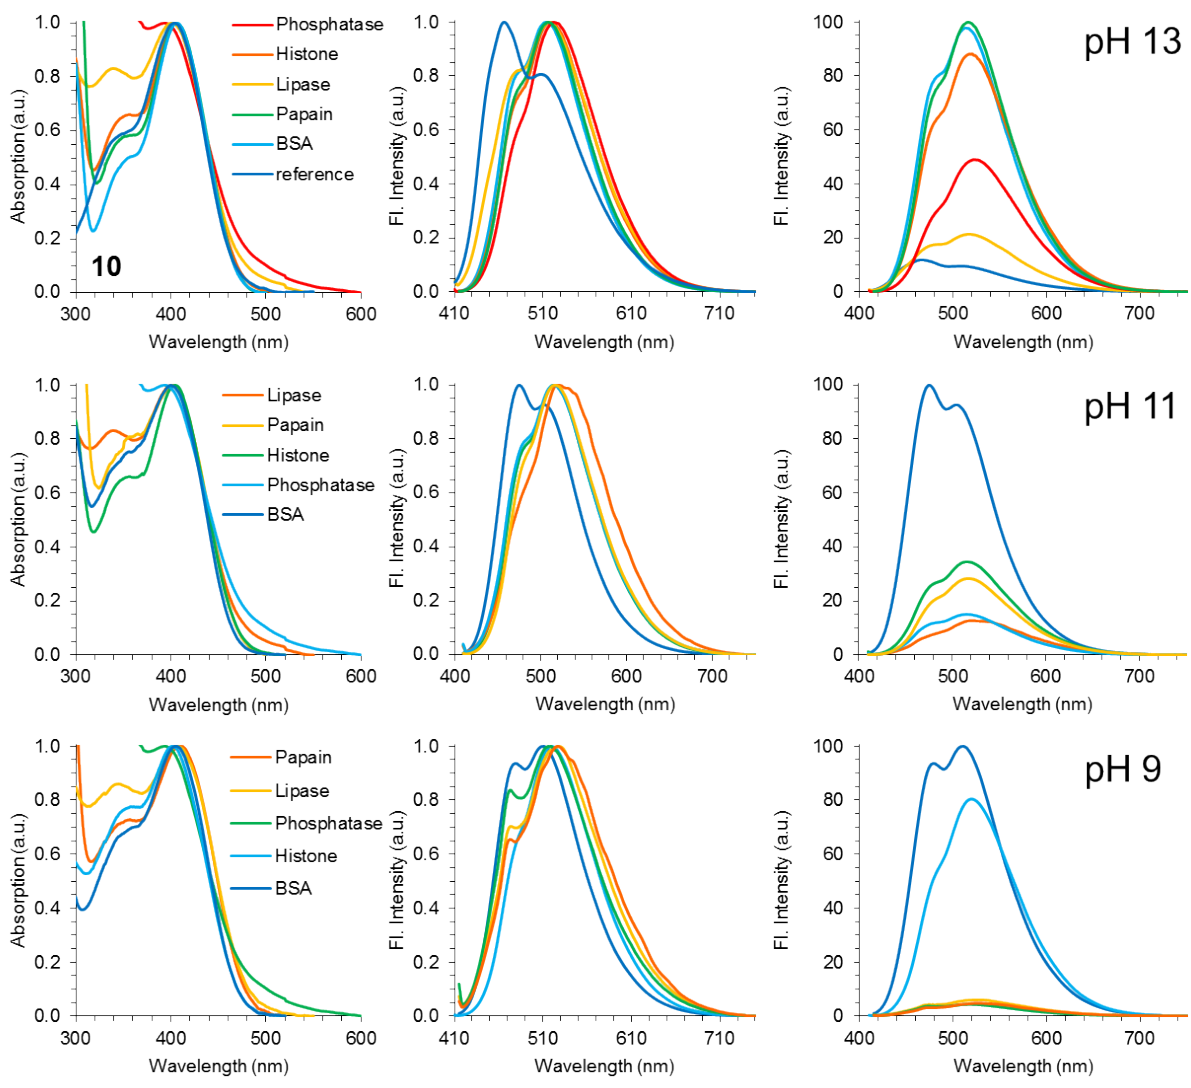

**Fig S3** Absorption spectra (left), normalized emission spectra (middle), and non-normalized emission spectra (right) of buffered aqueous solutions (top: pH 13, middle: pH 11, bottom: pH 9) of **10** upon addition of different proteins

## 2.2 Detection Limit

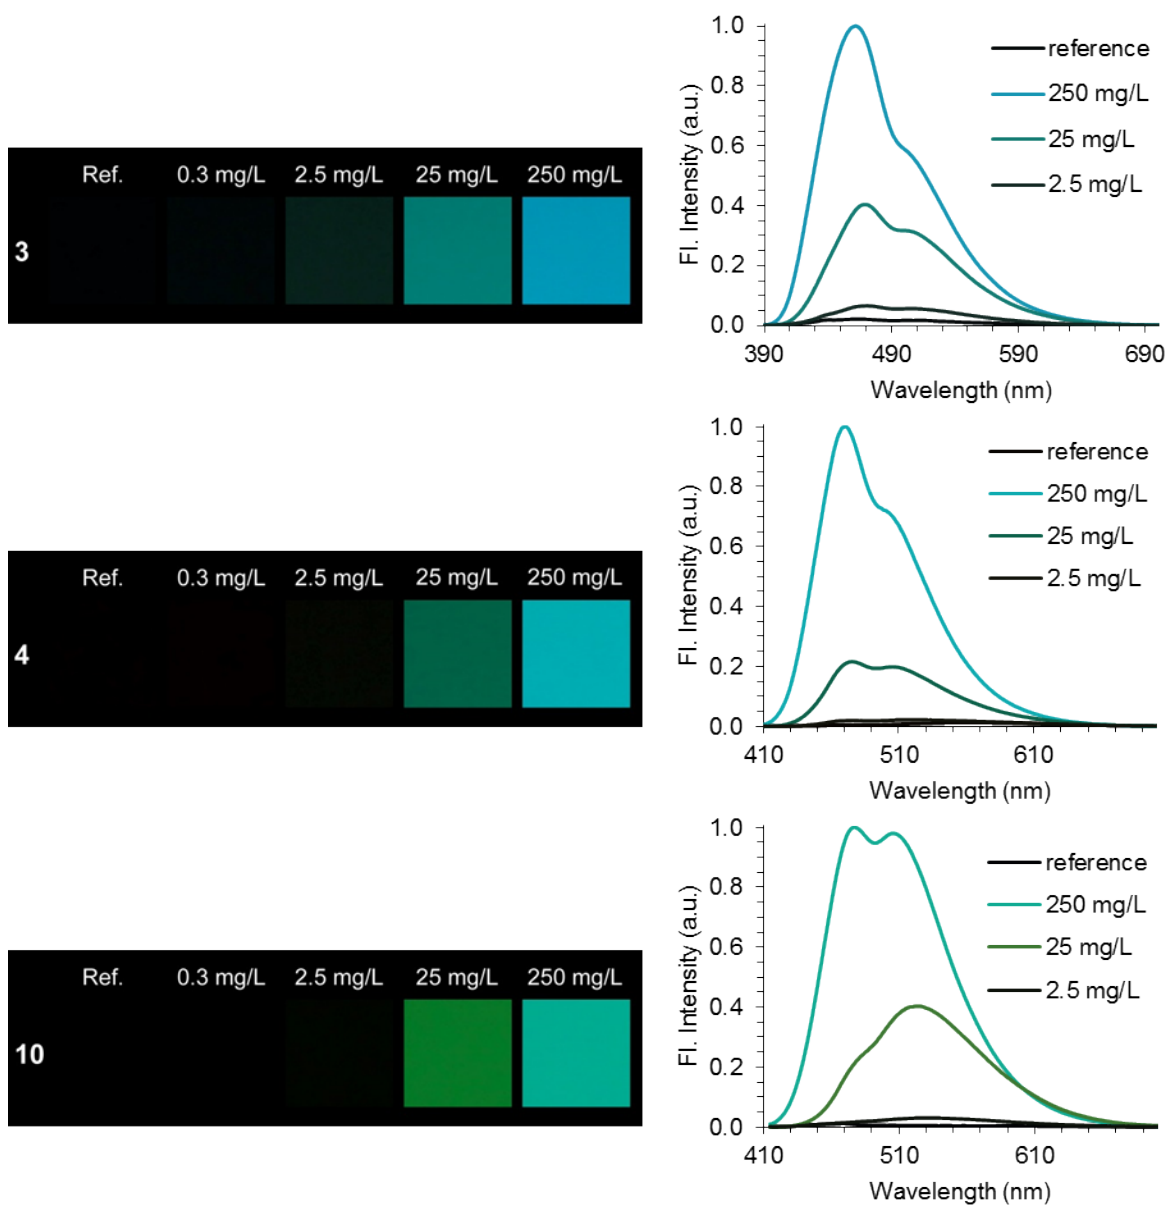

**Fig S4** Photographs and fluorescence spectra of buffered aqueous solutions (pH 11,  $c = 4.4 \mu\text{M}$ ) of **3** (top), **4** (middle) and **10** (bottom) at the concentrations of bovine serum albumin specified in the panel.

## 2.3 Comparison of Proteins and Amino Acid

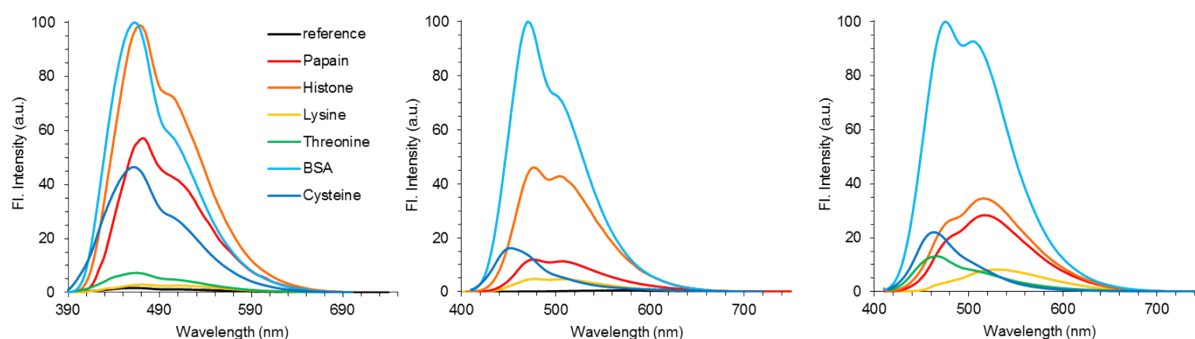

**Fig S5** Non-normalized emission spectra of buffered aqueous solutions (pH 11) of **3** (left), **4** (middle) and **10** (right) upon addition of different proteins and amino acids.

## 2.4 Linear Discriminant Analysis

LDA was performed after 1 h reaction time of buffered aqueous solutions (pH 11,  $c = 4.4 \mu\text{M}$ ) of **3**, **4** and **10** with albumins or protein shakes ( $c = 0.25 \text{ g/L}$ ). The final concentrations for fluorescence measurements were  $A = 0.038$  at 280 nm, which was calibrated using UV/vis spectroscopy. The fluorescence intensity values at 495 nm (albumins) and at 465 nm (protein shakes) were recorded with excitation at 380 nm. This process was repeated for each protein target to generate five replicates of each. Thus, the five albumins (or six protein shakes) were tested against a three fluorophore array (**3**, **4** and **10**) five times to afford a data matrix of 3 fluorophores  $\times$  5 albumins (or 6 shakes)  $\times$  5 replicates. To obtain a fluorescence reference value the pure buffered fluorophore solution was measured at  $A_{280} = 0.038$  and subtracted from the fluorescence response in presence of analytes. The data matrix was processed using classical linear discriminant analysis (LDA) in SYSTAT (version 13.0). In LDA, all variables were used in the model (complete mode) and the tolerance was set as 0.001. The fluorescence response patterns were transformed to canonical patterns. The Mahalanobis distances of each individual pattern to the centroid of each group in a multidimensional space were calculated and the assignment of the case was based on the shortest Mahalanobis distance. For the blind experiment another 18 unknown albumin samples were subjected to analysis via LDA and treated equally to the training cases. The protein sample preparation, data collection and analysis via LDA were carried out by different persons.

**Table S1.** Training matrix of fluorescence response patterns of the three DSB array (**3**, **4** and **10**) against five albumin analytes with identical absorption values of  $A = 0.038$  at 280 nm measured with the same excitation wavelength (380 nm). Fluorescence response was recorded at 495 nm and LDA was carried out as described above resulting in the three factors of the canonical scores and group generation.

| Analyte     | Fluorescence response pattern |          |           | Results LDA |          |          |       |
|-------------|-------------------------------|----------|-----------|-------------|----------|----------|-------|
|             | <b>3</b>                      | <b>4</b> | <b>10</b> | Factor 1    | Factor 2 | Factor 3 | Group |
| Albumin     |                               |          |           |             |          |          |       |
| BSA         | 65.868                        | 56.898   | 58.002    | -3.767      | -17.536  | 8.151    | 1.000 |
| BSA         | 68.506                        | 56.910   | 59.042    | -2.420      | -16.646  | 9.621    | 1.000 |
| BSA         | 65.186                        | 57.243   | 56.461    | -4.019      | -17.195  | 6.540    | 1.000 |
| BSA         | 67.414                        | 55.478   | 59.769    | -3.905      | -17.198  | 10.980   | 1.000 |
| BSA         | 65.536                        | 55.979   | 58.968    | -4.486      | -17.953  | 9.496    | 1.000 |
| PSA         | 95.450                        | 95.930   | 68.581    | 40.642      | -18.696  | -5.892   | 5.000 |
| PSA         | 98.055                        | 96.668   | 69.188    | 42.467      | -17.814  | -5.312   | 5.000 |
| PSA         | 96.314                        | 95.480   | 66.632    | 40.437      | -17.053  | -6.797   | 5.000 |
| PSA         | 98.236                        | 94.965   | 65.678    | 40.796      | -15.339  | -6.621   | 5.000 |
| PSA         | 95.561                        | 94.525   | 65.985    | 39.286      | -16.835  | -6.755   | 5.000 |
| HSA         | 134.762                       | 77.625   | 42.771    | 41.255      | 22.056   | -1.121   | 2.000 |
| HSA         | 131.874                       | 78.976   | 42.485    | 40.926      | 20.218   | -3.129   | 2.000 |
| HSA         | 133.266                       | 76.506   | 43.210    | 39.785      | 21.340   | -0.326   | 2.000 |
| HSA         | 136.935                       | 77.900   | 40.537    | 42.157      | 24.349   | -2.452   | 2.000 |
| HSA         | 134.942                       | 75.646   | 41.398    | 39.657      | 23.479   | -0.601   | 2.000 |
| Ovalbumin   | 75.852                        | 31.723   | 27.859    | -22.271     | 11.514   | 7.183    | 4.000 |
| Ovalbumin   | 78.225                        | 32.544   | 29.207    | -20.392     | 11.852   | 8.199    | 4.000 |
| Ovalbumin   | 78.088                        | 32.768   | 28.590    | -20.366     | 12.037   | 7.526    | 4.000 |
| Ovalbumin   | 78.362                        | 35.013   | 30.478    | -18.292     | 10.509   | 7.311    | 4.000 |
| Ovalbumin   | 77.688                        | 32.782   | 29.606    | -20.403     | 11.275   | 8.179    | 4.000 |
| Lactalbumin | 28.700                        | 17.165   | 8.368     | -57.323     | 0.404    | -8.845   | 3.000 |
| Lactalbumin | 29.159                        | 16.816   | 8.055     | -57.419     | 0.927    | -8.695   | 3.000 |
| Lactalbumin | 28.277                        | 17.073   | 7.958     | -57.639     | 0.417    | -9.197   | 3.000 |
| Lactalbumin | 28.864                        | 16.945   | 8.222     | -57.433     | 0.638    | -8.745   | 3.000 |
| Lactalbumin | 29.570                        | 16.792   | 7.888     | -57.272     | 1.248    | -8.695   | 3.000 |

**Table S2.** Detection and Identification of unknown albumin samples using LDA. All unknown samples could be assigned to the corresponding albumin group defined by the training matrix.

| Sample | Fluorescence response pattern |          |           | Results LDA |          |          |       | Analyte   |
|--------|-------------------------------|----------|-----------|-------------|----------|----------|-------|-----------|
|        | <b>3</b>                      | <b>4</b> | <b>10</b> | Factor 1    | Factor 2 | Factor 3 | Group | Albumin   |
| 1      | 98.152                        | 91.164   | 68.581    | 38.264      | -15.780  | -1.540   | 5     | PSA       |
| 2      | 77.560                        | 33.660   | 27.330    | -20.097     | 12.148   | 5.750    | 4     | Ovalbumin |
| 3      | 67.401                        | 55.232   | 55.055    | -4.720      | -14.630  | 7.594    | 1     | BSA       |
| 4      | 70.162                        | 56.818   | 55.130    | -2.253      | -13.634  | 7.165    | 1     | BSA       |

|    |         |        |        |         |         |        |   |             |
|----|---------|--------|--------|---------|---------|--------|---|-------------|
| 5  | 140.874 | 74.328 | 39.668 | 41.129  | 28.045  | 0.655  | 2 | HSA         |
| 6  | 27.201  | 16.347 | 8.028  | -58.669 | 0.009   | -8.872 | 3 | Lactalbumin |
| 7  | 78.103  | 31.069 | 27.669 | -21.768 | 13.045  | 8.130  | 4 | Ovalbumin   |
| 8  | 102.212 | 94.533 | 63.963 | 42.051  | -12.120 | -6.546 | 5 | PSA         |
| 9  | 139.328 | 74.404 | 41.424 | 40.715  | 26.243  | 1.521  | 2 | HSA         |
| 10 | 29.395  | 17.235 | 8.368  | -56.953 | 0.763   | -8.716 | 3 | Lactalbumin |
| 11 | 26.519  | 15.912 | 8.245  | -59.279 | -0.348  | -8.554 | 3 | Lactalbumin |
| 12 | 70.986  | 55.425 | 54.882 | -2.966  | -12.632 | 8.258  | 1 | BSA         |
| 13 | 75.852  | 29.317 | 26.449 | -24.279 | 12.987  | 7.953  | 4 | Ovalbumin   |
| 14 | 140.777 | 72.952 | 39.600 | 40.034  | 28.442  | 1.629  | 2 | HSA         |
| 15 | 73.659  | 34.206 | 28.838 | -21.259 | 9.045   | 5.450  | 4 | Ovalbumin   |
| 16 | 103.089 | 96.545 | 67.124 | 44.391  | -13.923 | -5.458 | 5 | PSA         |
| 17 | 31.014  | 17.433 | 8.129  | -56.098 | 1.718   | -8.623 | 3 | Lactalbumin |
| 18 | 65.868  | 52.473 | 56.021 | -7.379  | -15.151 | 10.031 | 1 | BSA         |

**Table S3.** Training matrix of fluorescence response patterns of the three DSB array (**3**, **4** and **10**) against six protein shake analytes with identical absorption values of  $A = 0.038$  at 280 nm measured with the same excitation wavelength (380 nm). Fluorescence response was recorded at 465 nm and LDA was carried out as described above resulting in the three factors of the canonical scores and group generation

| Analyte | Fluorescence response pattern |          |           | Results LDA |          |          |       |
|---------|-------------------------------|----------|-----------|-------------|----------|----------|-------|
|         | <b>3</b>                      | <b>4</b> | <b>10</b> | Factor 1    | Factor 2 | Factor 3 | Group |
| Whey    | 74.190                        | 30.763   | 12.527    | -2.710      | -6.202   | 3.028    | 6.000 |
| Whey    | 80.538                        | 32.506   | 12.197    | -0.337      | -7.150   | 5.330    | 6.000 |
| Whey    | 82.544                        | 33.256   | 12.079    | 0.440       | -7.263   | 6.205    | 6.000 |
| Whey    | 82.557                        | 34.015   | 12.446    | 0.952       | -6.442   | 6.030    | 6.000 |
| Whey    | 77.719                        | 33.839   | 12.799    | -0.521      | -4.589   | 4.802    | 6.000 |
| Egg     | 114.592                       | 48.660   | 23.695    | 26.459      | -2.114   | -1.352   | 2.000 |
| Egg     | 113.047                       | 49.246   | 24.656    | 26.930      | -0.678   | -2.834   | 2.000 |
| Egg     | 116.494                       | 50.114   | 24.652    | 28.369      | -1.220   | -1.937   | 2.000 |
| Egg     | 115.396                       | 50.199   | 24.068    | 27.426      | -0.860   | -0.977   | 2.000 |
| Egg     | 112.833                       | 51.523   | 24.281    | 26.962      | 1.484    | -0.804   | 2.000 |
| Soy     | 54.833                        | 20.782   | 11.724    | -12.633     | -8.269   | -3.690   | 5.000 |
| Soy     | 58.585                        | 21.193   | 12.458    | -10.471     | -9.169   | -4.335   | 5.000 |
| Soy     | 55.317                        | 21.956   | 12.465    | -11.506     | -7.137   | -4.217   | 5.000 |
| Soy     | 56.756                        | 22.054   | 12.139    | -11.270     | -7.704   | -3.437   | 5.000 |
| Soy     | 54.254                        | 21.959   | 11.919    | -12.417     | -6.860   | -3.370   | 5.000 |
| Casein  | 54.971                        | 33.905   | 14.475    | -7.253      | 4.982    | -0.443   | 3.000 |
| Casein  | 59.494                        | 35.602   | 14.582    | -5.141      | 4.835    | 0.878    | 1.000 |
| Casein  | 58.406                        | 34.709   | 14.501    | -5.803      | 4.392    | 0.361    | 1.000 |
| Casein  | 58.365                        | 35.259   | 14.590    | -5.619      | 4.959    | 0.537    | 1.000 |
| Casein  | 58.293                        | 37.073   | 15.140    | -4.746      | 6.873    | 0.679    | 1.000 |

|                        |        |        |        |        |       |        |       |
|------------------------|--------|--------|--------|--------|-------|--------|-------|
| Multi <sub>exp</sub>   | 63.907 | 35.186 | 14.614 | -3.578 | 2.690 | 1.023  | 4.000 |
| Multi <sub>exp</sub>   | 61.746 | 36.487 | 15.530 | -3.229 | 5.044 | -0.004 | 4.000 |
| Multi <sub>exp</sub>   | 62.603 | 37.249 | 14.740 | -3.512 | 5.217 | 1.934  | 4.000 |
| Multi <sub>exp</sub>   | 63.192 | 37.223 | 15.104 | -2.953 | 5.057 | 1.342  | 4.000 |
| Multi <sub>exp</sub>   | 61.045 | 36.436 | 14.958 | -4.042 | 5.119 | 0.893  | 4.000 |
| Multi <sub>cheap</sub> | 55.130 | 33.462 | 14.076 | -7.666 | 4.387 | -0.001 | 3.000 |
| Multi <sub>cheap</sub> | 56.481 | 34.891 | 14.017 | -6.933 | 5.200 | 1.119  | 1.000 |
| Multi <sub>cheap</sub> | 57.214 | 34.667 | 15.535 | -5.261 | 5.108 | -1.597 | 3.000 |
| Multi <sub>cheap</sub> | 57.183 | 34.646 | 16.257 | -4.587 | 5.297 | -2.877 | 3.000 |
| Multi <sub>cheap</sub> | 56.629 | 34.264 | 15.752 | -5.352 | 5.013 | -2.285 | 3.000 |

### 3 NMR spectra

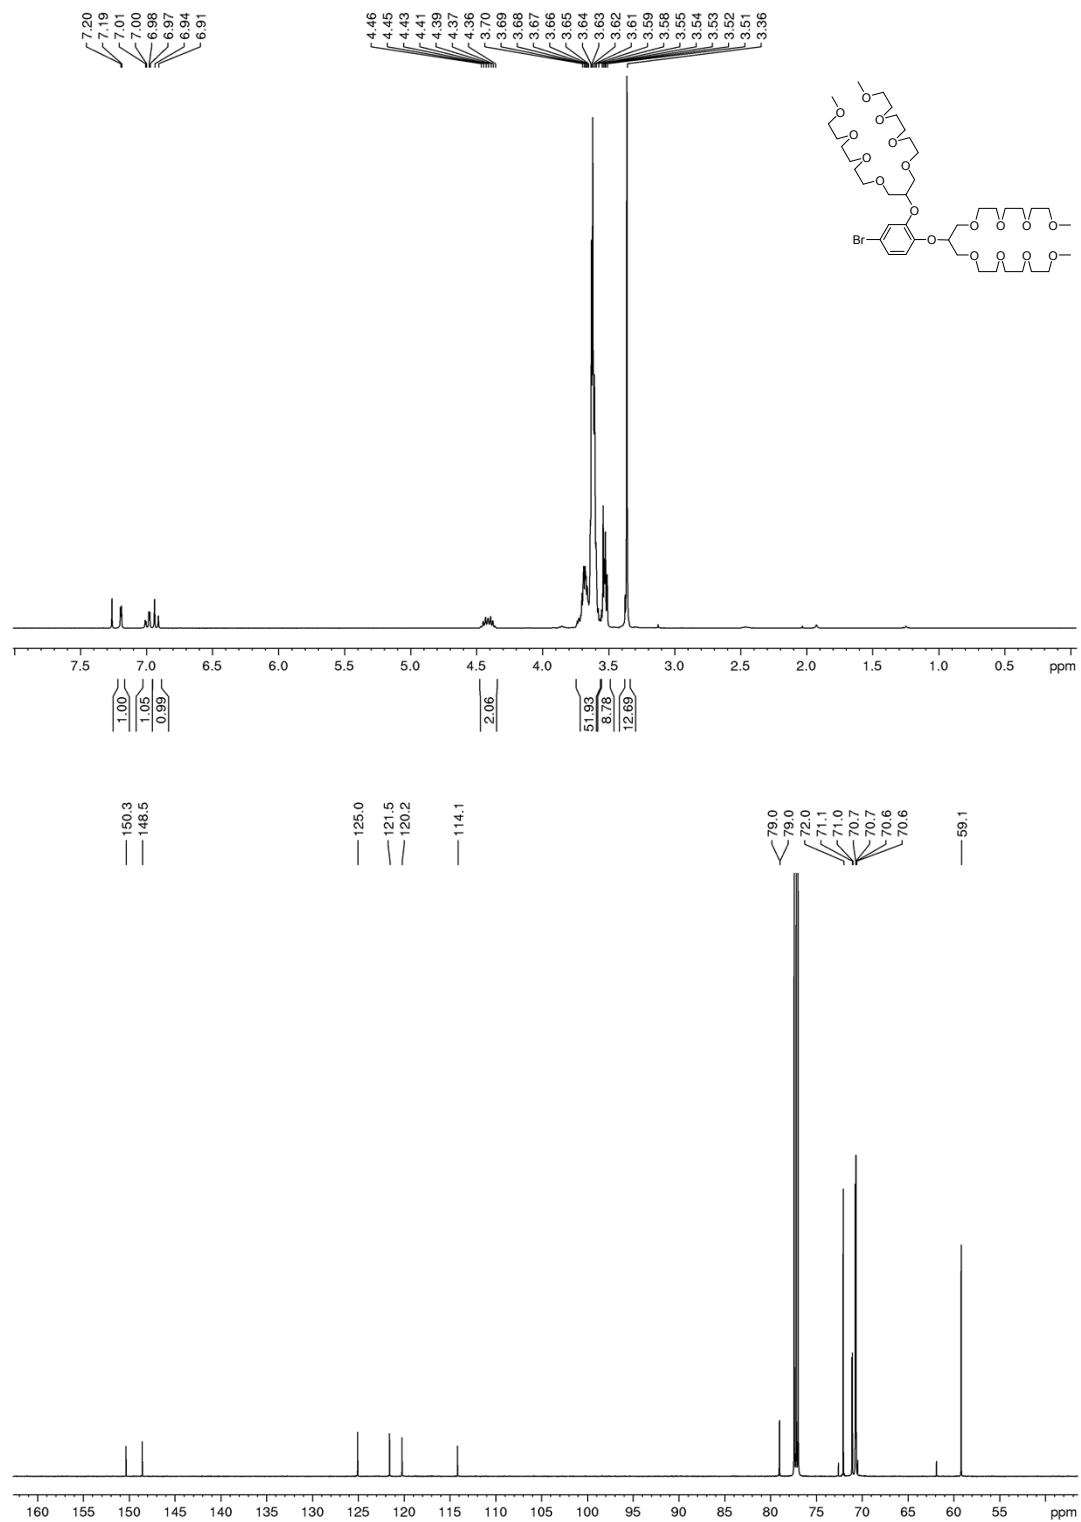

**Fig S6**  $^1\text{H}$ -NMR spectrum (300 MHz,  $\text{CDCl}_3$ , top) and  $^{13}\text{C}\{^1\text{H}\}$ -NMR spectrum (150 MHz,  $\text{CDCl}_3$ , bottom) of **S1**.



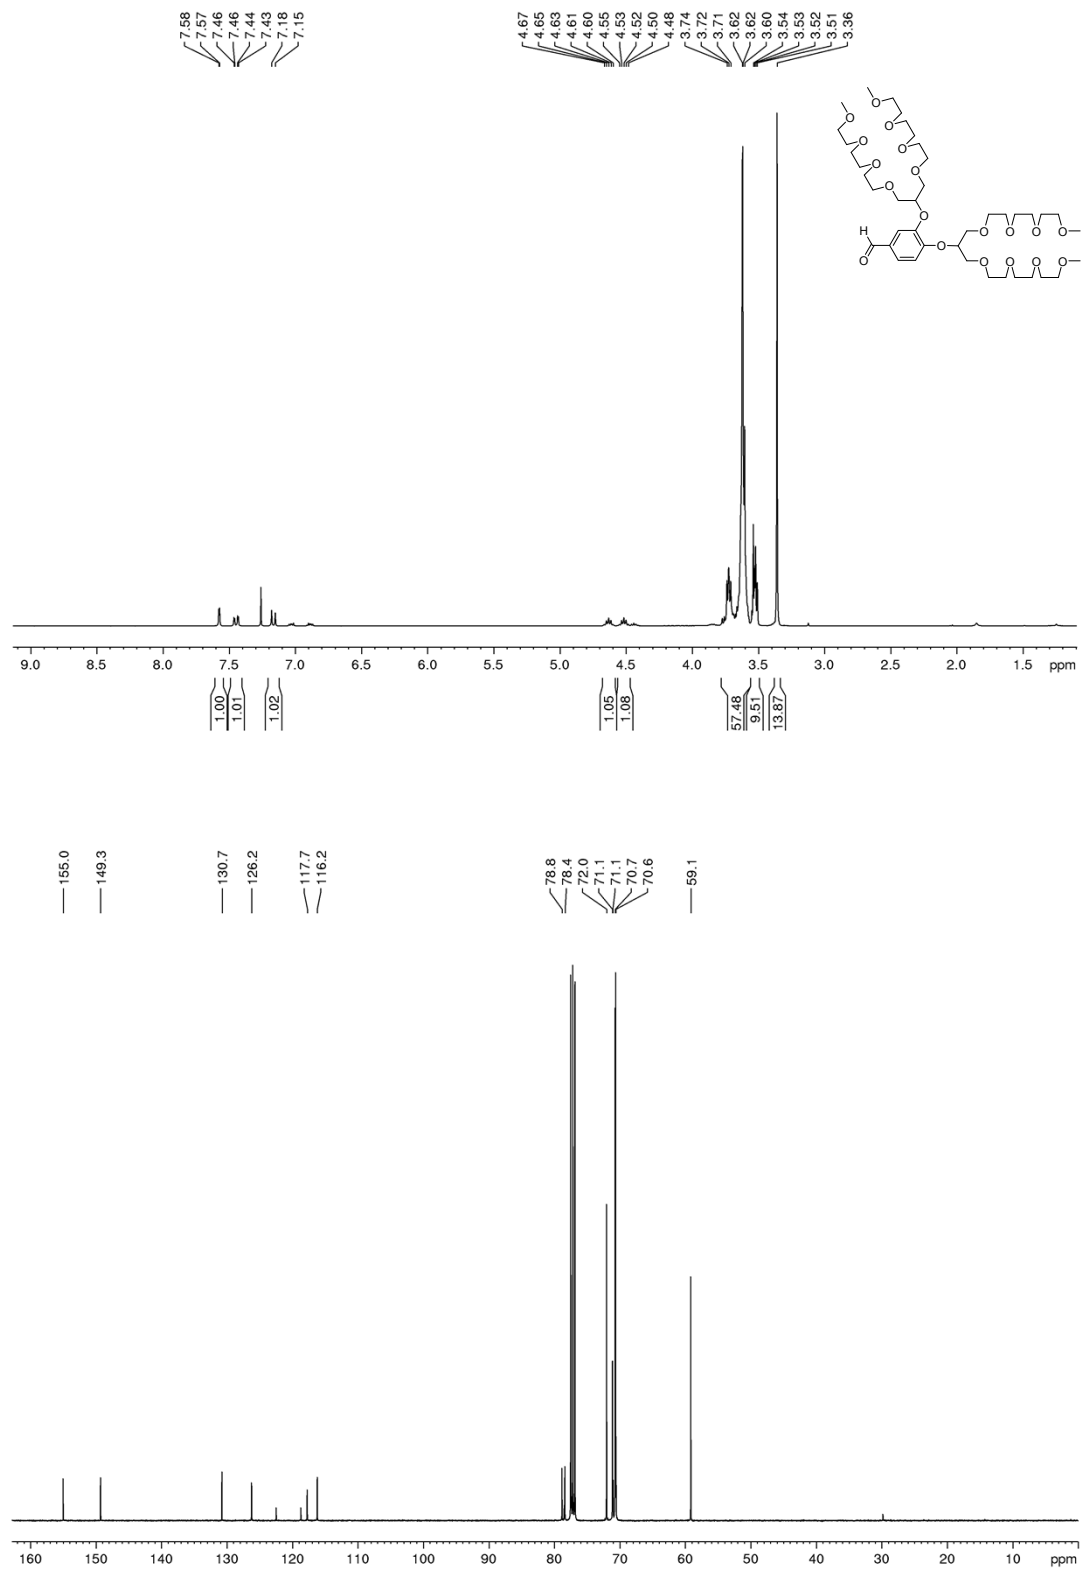

**Fig S7**  $^1\text{H}$ -NMR spectrum (300 MHz,  $\text{CDCl}_3$ , top) and  $^{13}\text{C}\{^1\text{H}\}$ -NMR spectrum (100 MHz,  $\text{CDCl}_3$ , bottom) of **1**.

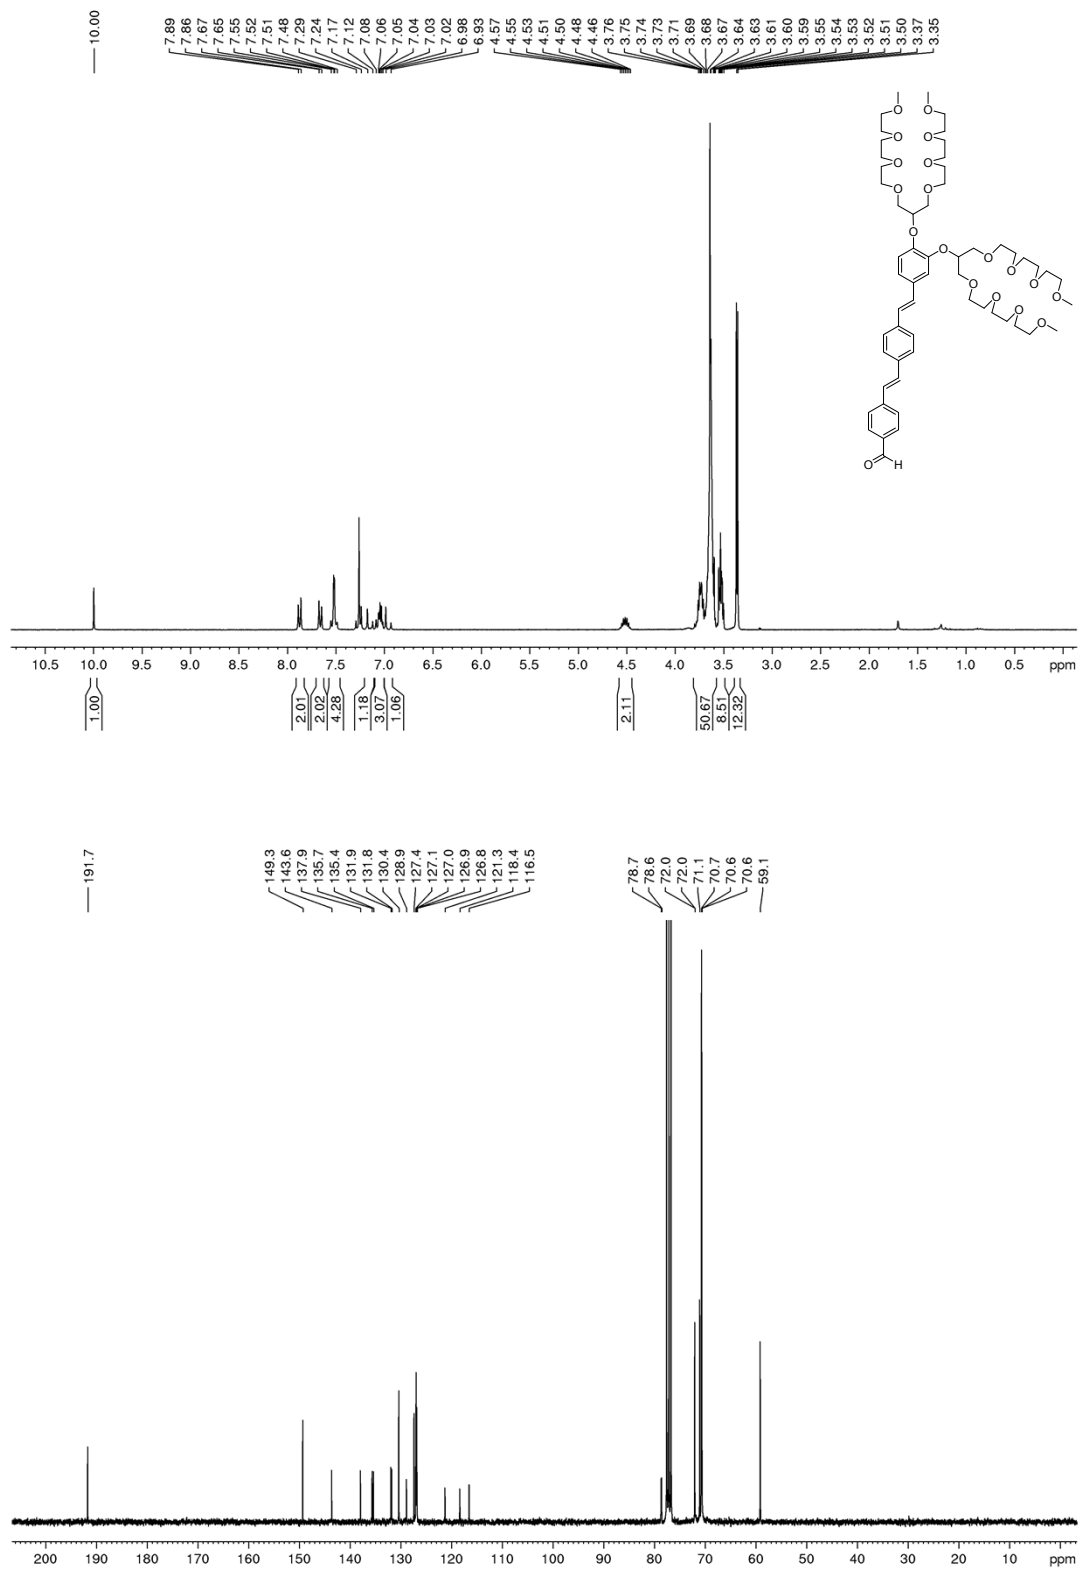

**Fig S8**  $^1\text{H}$ -NMR spectrum (300 MHz,  $\text{CDCl}_3$ , top) and  $^{13}\text{C}\{^1\text{H}\}$ -NMR spectrum (75 MHz,  $\text{CDCl}_3$ , bottom) of **3**.

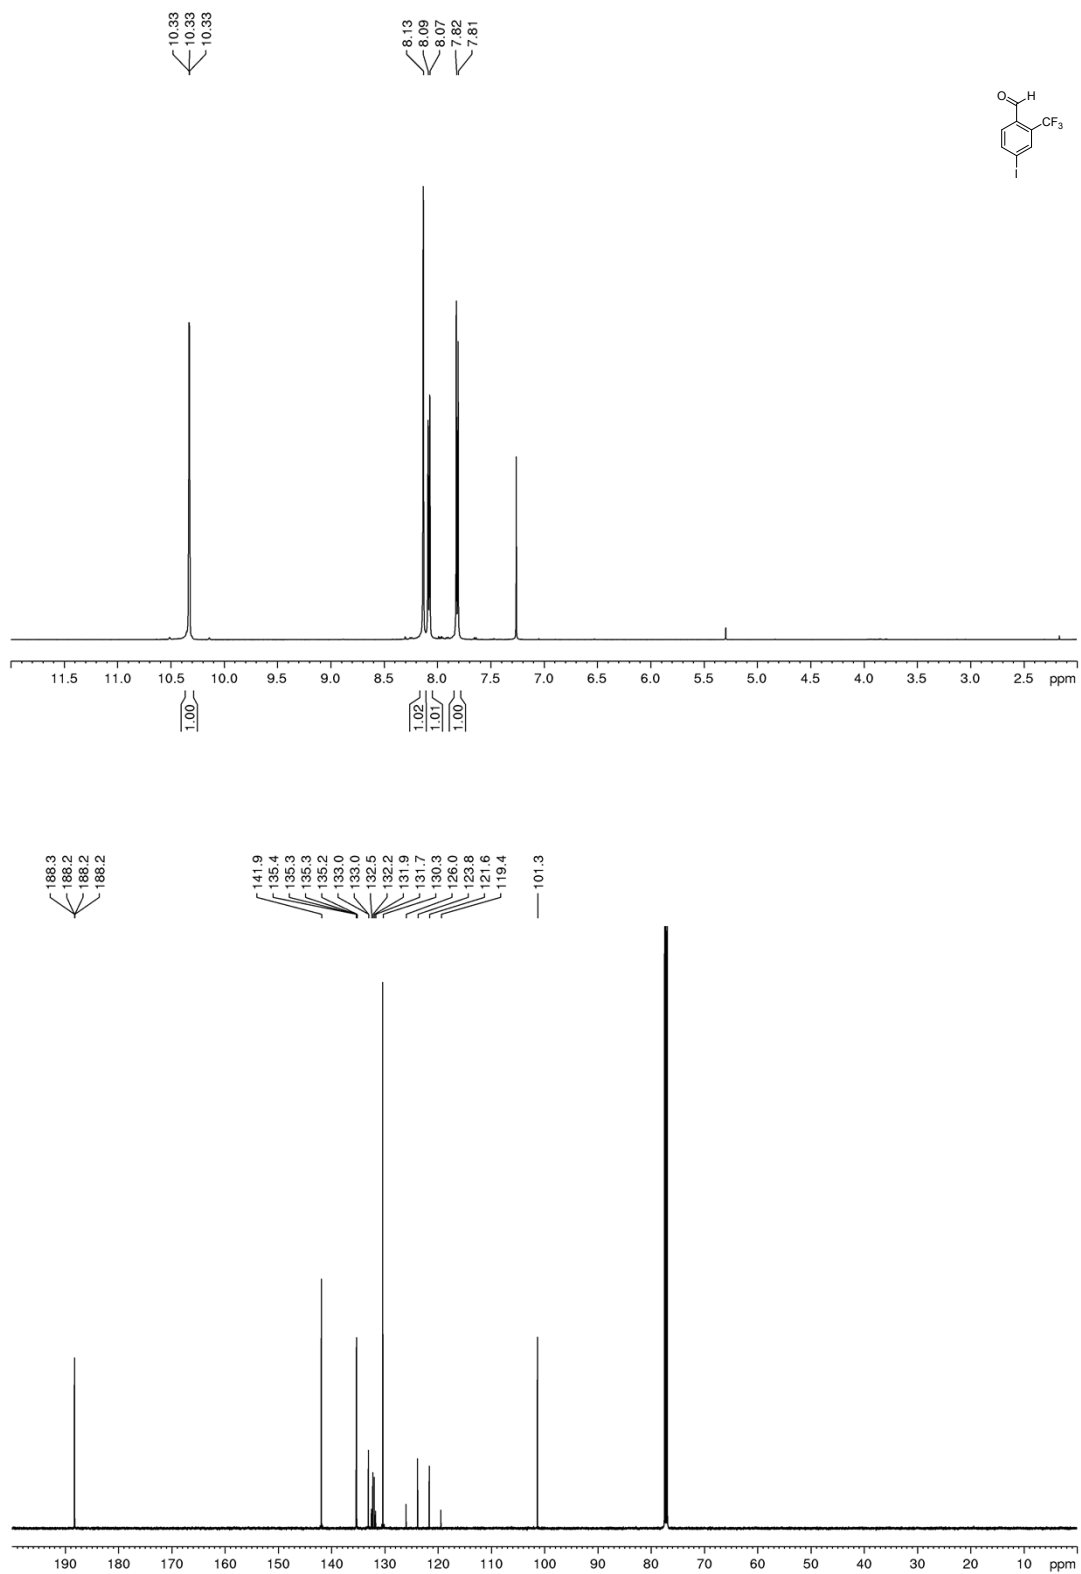

**Fig S9** <sup>1</sup>H-NMR spectrum (500 MHz, CDCl<sub>3</sub>, top) and <sup>13</sup>C{<sup>1</sup>H}-NMR spectrum (125 MHz, CDCl<sub>3</sub>, bottom) of **6**.

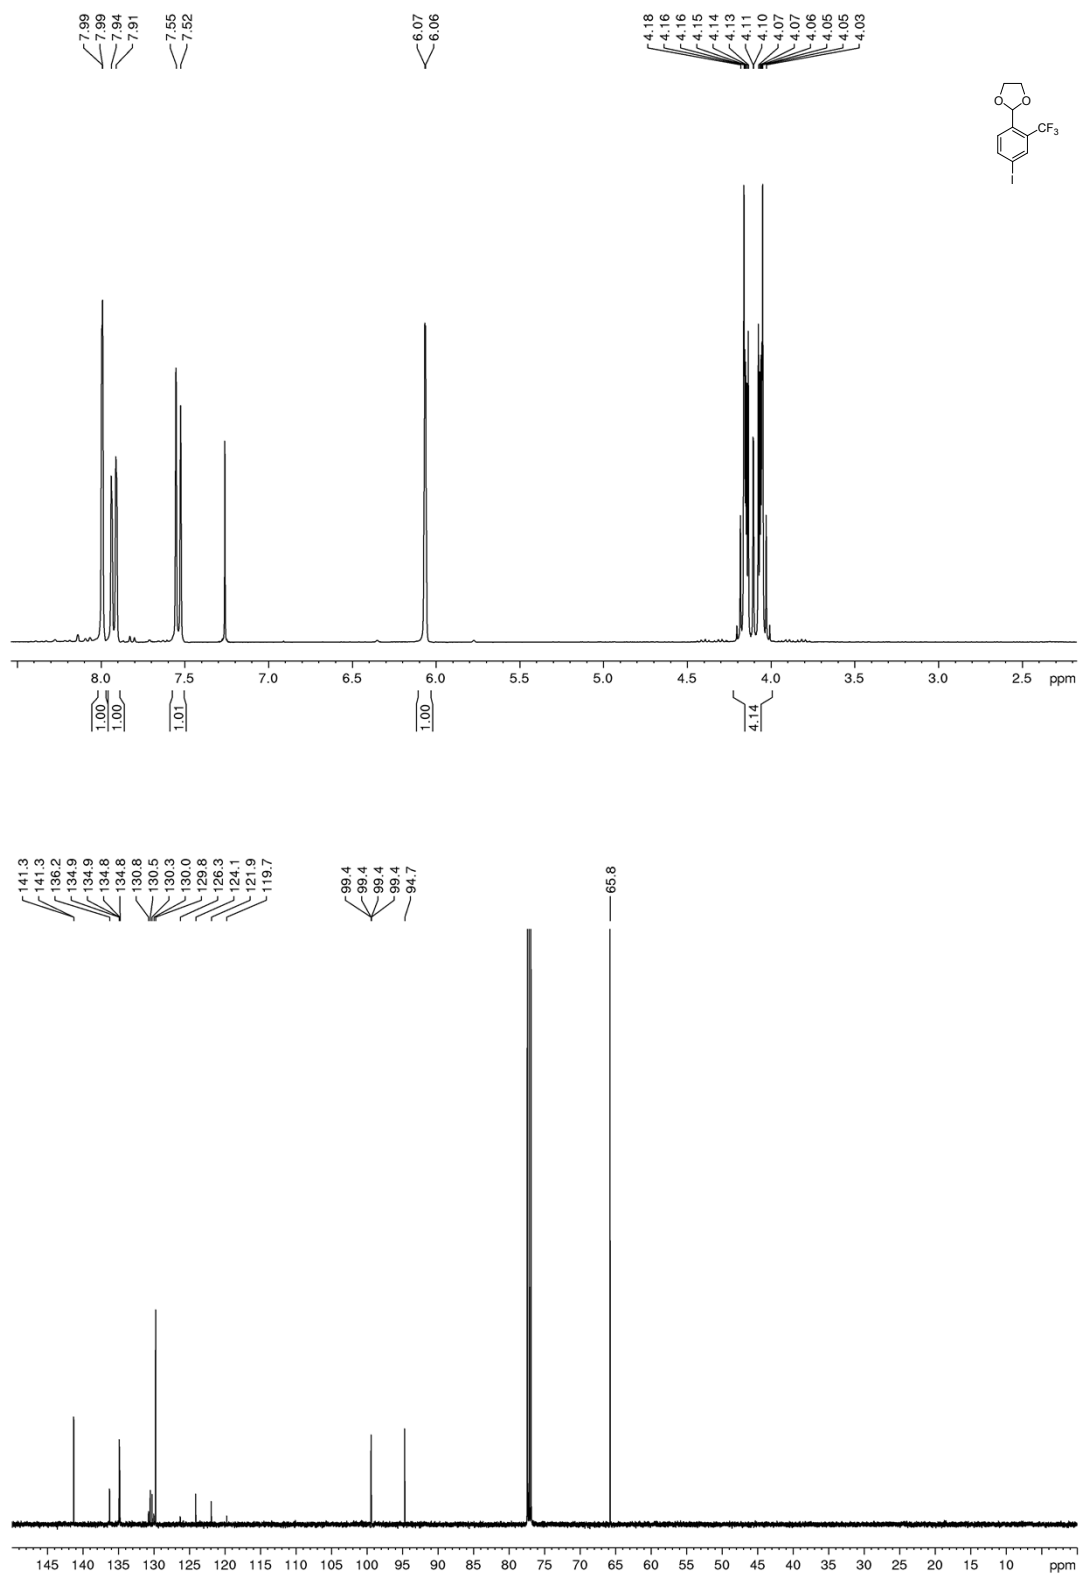

**Fig S10** <sup>1</sup>H-NMR spectrum (300 MHz, CDCl<sub>3</sub>, top) and <sup>13</sup>C{<sup>1</sup>H}-NMR spectrum (125 MHz, CDCl<sub>3</sub>, bottom) of **7**.

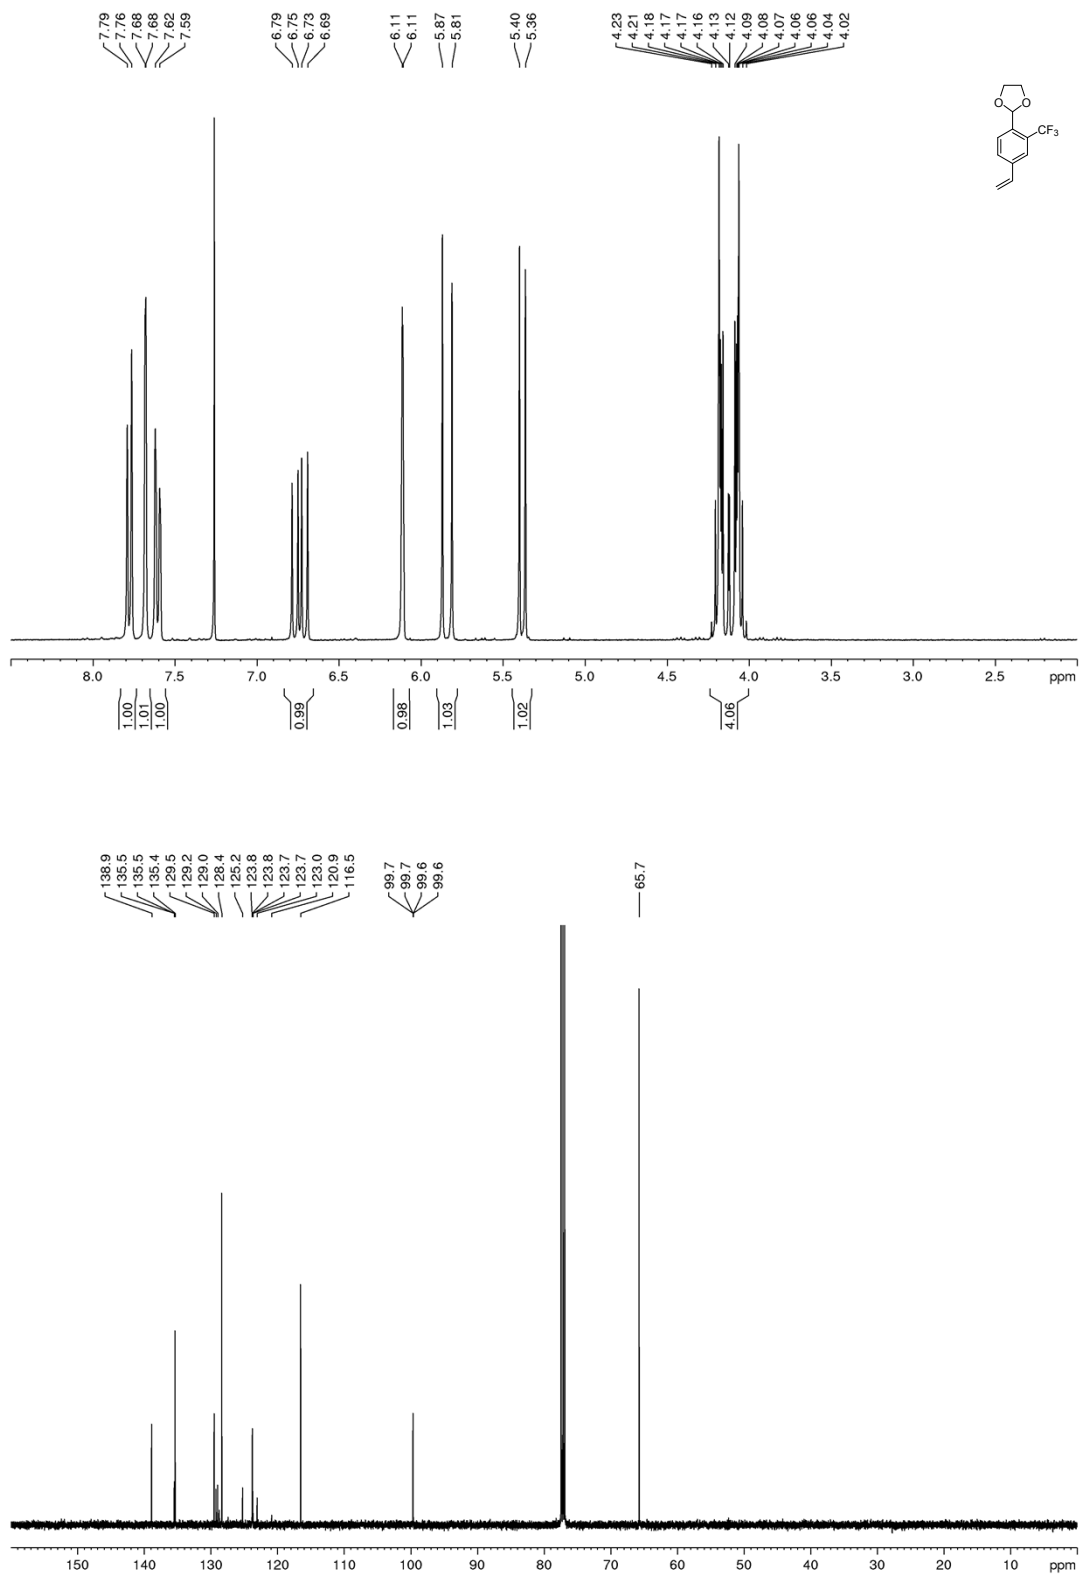

**Fig S11** <sup>1</sup>H-NMR spectrum (300 MHz, CDCl<sub>3</sub>, top) and <sup>13</sup>C{<sup>1</sup>H}-NMR spectrum (125 MHz, CDCl<sub>3</sub>, bottom) of **8**.

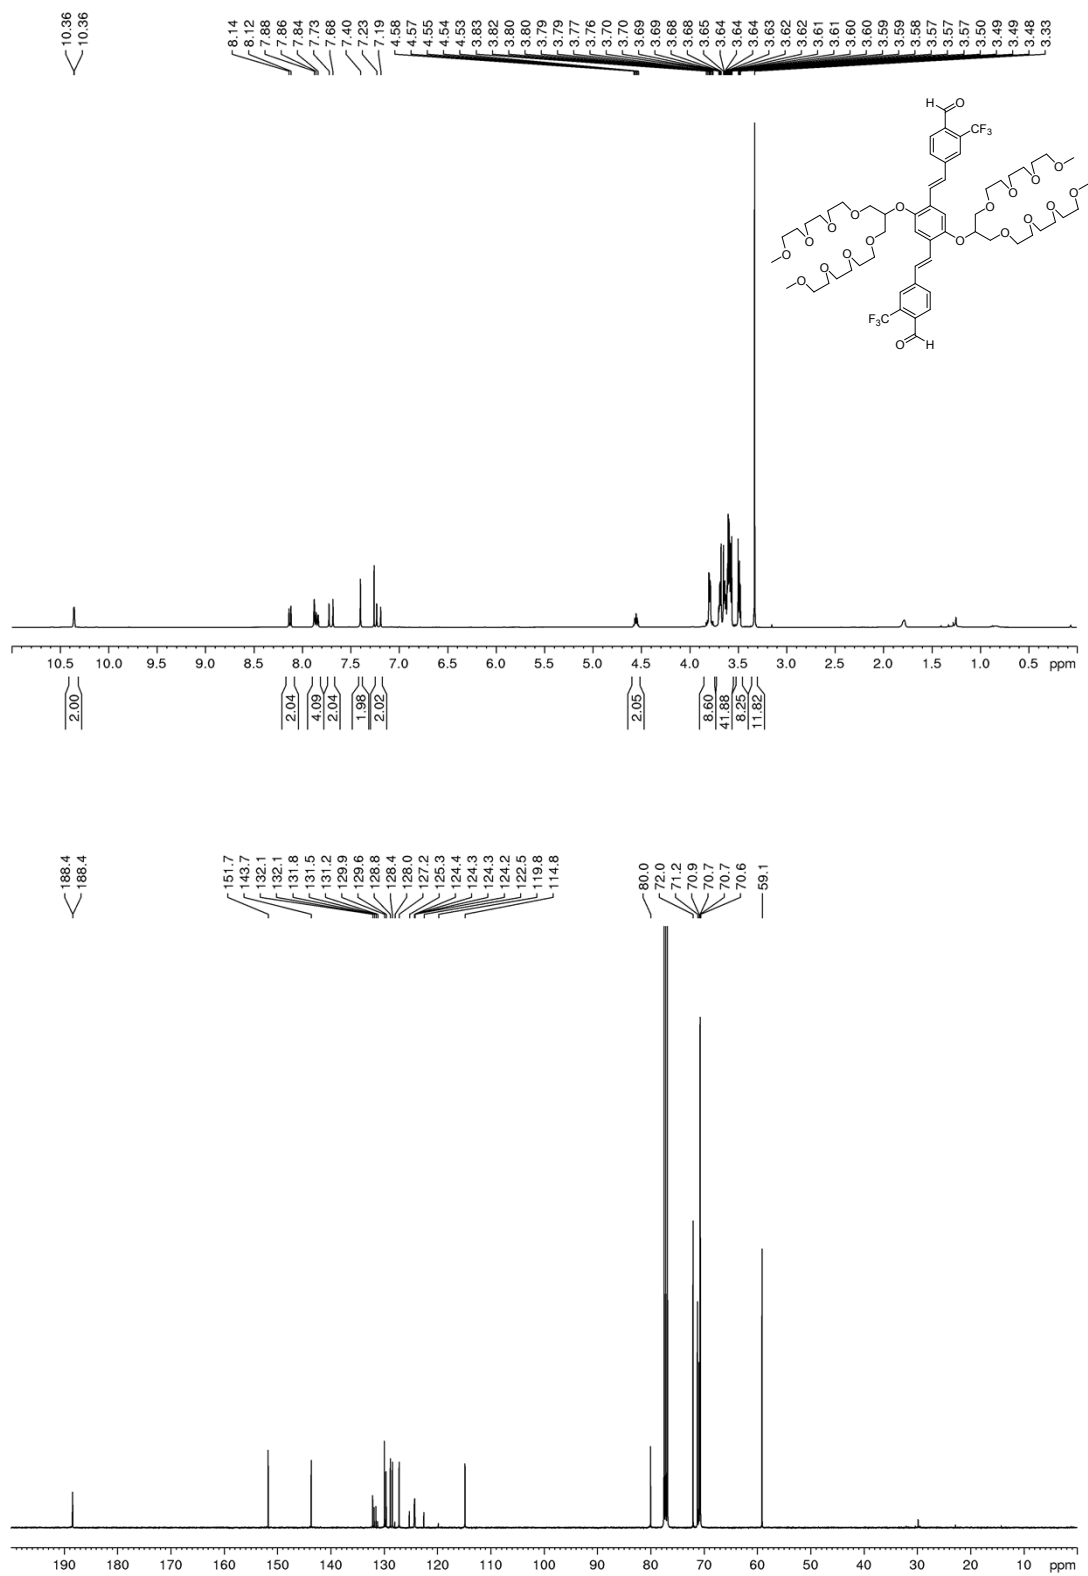

**Fig S12**  $^1\text{H-NMR}$  spectrum (300 MHz,  $\text{CDCl}_3$ , top) and  $^{13}\text{C}\{^1\text{H}\}$ -NMR spectrum (125 MHz,  $\text{CDCl}_3$ , bottom) of **10**.

## Literature:

- <sup>1</sup> J. Freudenberg, J. Kumpf, V. Schäfer, E. Sauter, S. J. Wörner, K. Brödner, A. Dreuw, U. H. F. Bunz, *J. Org. Chem.*, 2013, **78**, 4949-4959.
